# Supplementary material
Source: ML conference proceedings conference paper supplement (https://proceedings.neurips.cc/paper_files/paper/2022/hash/c573258c38d0a3919d8c1364053c45df-Abstract.html)
Supplement: Supplementary file 1 [file c573258c38d0a3919d8c1364053c45df-Supplemental-Conference.zip]

Archive with 4 entries (4 files):
- CodeFormer-video-demo.mp4
- __MACOSX/._CodeFormer-video-demo.mp4
- CodeFormer_supp.pdf
- __MACOSX/._CodeFormer_supp.pdf
